# Supplementary material for: Linker installation transformations in a 2-D rare earth MOF: increase of the dimensionality and turn on of the temperature sensing capability
Source: Royal Society of Chemistry journal article supplement (doi:10.1039/d4tc00992d), 2024-01-01
Supplement: d4tc00992d1.pdf [file d4tc00992d1.pdf]

## **Electronic Supplementary Information (ESI)**

### **Linker Installation Transformations in a 2-D Rare Earth MOF: Increase of the Dimensionality and Turn on of the Temperature Sensing Capability**

Laoura Komodiki<sup>a</sup>, Nikos Panagiotou<sup>a</sup>, H el ene Serier-Brault<sup>b\*</sup>, Anastasios J. Tasiopoulos<sup>a\*</sup>

<sup>a</sup>Department of Chemistry, University of Cyprus, 1678 Nicosia, Cyprus. E-mail: [atasio@ucy.ac.cy](mailto:atasio@ucy.ac.cy)

<sup>b</sup>Nantes Universit e CNRS Institut des Mat eriaux de Nantes Jean Rouxel, IMN Nantes F-44000, France. E-mail: [helene.brault@cnrs-immn.fr](mailto:helene.brault@cnrs-immn.fr)

## Table of Contents

|                                                                                                                                                                                                                                                        |    |
|--------------------------------------------------------------------------------------------------------------------------------------------------------------------------------------------------------------------------------------------------------|----|
| Abbreviations .....                                                                                                                                                                                                                                    | 3  |
| Experimental Part.....                                                                                                                                                                                                                                 | 3  |
| Physical Measurements/Characterization of UCY-17(RE) (RE: Y, Gd, Tb, Dy, Ho, Er).....                                                                                                                                                                  | 7  |
| Physical Measurements/Characterization of UCY-17(Eu <sub>0.05</sub> Tb <sub>0.95</sub> ) and UCY-17(RE)/L; RE= Gd, Tb, Eu <sub>0.05</sub> Tb <sub>0.95</sub> , L=BDC <sup>2-</sup> , ABDC <sup>2-</sup> , FBDC <sup>2-</sup> , NDC <sup>2-</sup> ..... | 15 |
| References .....                                                                                                                                                                                                                                       | 33 |

## Abbreviations

The abbreviations of the organic molecules discussed in ESI are the following: H<sub>2</sub>BCPM = 4,4'-(hydroxymethylene)dibenzoic acid; H<sub>2</sub>BDC = 1,4 benzenedicarboxylic acid; H<sub>2</sub>ABDC = 2-aminobenzene-1,4-dicarboxylic acid; H<sub>2</sub>FBDC = 2-fluorobenzene-1,4-dicarboxylic acid; H<sub>2</sub>NDC = 1,4-naphthalenedicarboxylic acid; HFBA = 2-fluorobenzoic acid; TFA = trifluoroacetic acid; DMF = *N,N*-dimethylformamide; DMSO = dimethyl sulfoxide

## Experimental Part

### Materials

Reagent grade chemicals were obtained from commercial sources (Aldrich, Merck, Alfa Aesar, TCI, etc.) and used without further purification. All synthetic procedures were carried out in air. Other chemical reagents and solvents were of analytical grade and used without further purification.

**Table S1:** The  $\text{Eu}^{3+}/\text{Tb}^{3+}$  composition of the pristine MOF **UCY-17**( $\text{Eu}_{0.05}\text{Tb}_{0.95}$ ) and the exchanged analogues **UCY-17**( $\text{Eu}_{0.05}\text{Tb}_{0.95}$ )/L (L = BDC<sup>2-</sup>, ABDC<sup>2-</sup>, FBDC<sup>2-</sup> and NDC<sup>2-</sup>) determined by ICP-AES (Inductively Coupled Plasma – Atomic Emission Spectrometry).

| <b>Theoretical composition</b>                            | <b>ICP composition</b>               |
|-----------------------------------------------------------|--------------------------------------|
| <b>UCY-17</b> ( $\text{Eu}_{0.05}\text{Tb}_{0.95}$ )      | $\text{Eu}_{0.063}\text{Tb}_{0.937}$ |
| <b>UCY-17</b> ( $\text{Eu}_{0.05}\text{Tb}_{0.95}$ )/BDC  | $\text{Eu}_{0.058}\text{Tb}_{0.942}$ |
| <b>UCY-17</b> ( $\text{Eu}_{0.05}\text{Tb}_{0.95}$ )/ABDC | $\text{Eu}_{0.059}\text{Tb}_{0.941}$ |
| <b>UCY-17</b> ( $\text{Eu}_{0.05}\text{Tb}_{0.95}$ )/FBDC | $\text{Eu}_{0.064}\text{Tb}_{0.936}$ |
| <b>UCY-17</b> ( $\text{Eu}_{0.05}\text{Tb}_{0.95}$ )/NDC  | $\text{Eu}_{0.062}\text{Tb}_{0.938}$ |

## Crystallographic Data

**Table S2:** Selected Crystal Data for compounds UCY-17(RE).

| Compound                                  | UCY-17(Y)                                                          | UCY-17(Gd)                                                          | UCY-17(Tb)                                                          | UCY-17(Dy)                                                          | UCY-17(Ho)                                                          | UCY-17(Er)                                                          |
|-------------------------------------------|--------------------------------------------------------------------|---------------------------------------------------------------------|---------------------------------------------------------------------|---------------------------------------------------------------------|---------------------------------------------------------------------|---------------------------------------------------------------------|
| Empirical formula                         | C <sub>30</sub> H <sub>18</sub> NO <sub>19</sub><br>Y <sub>3</sub> | C <sub>30</sub> H <sub>18</sub> NO <sub>19</sub><br>Gd <sub>3</sub> | C <sub>30</sub> H <sub>18</sub> NO <sub>19</sub><br>Tb <sub>3</sub> | C <sub>30</sub> H <sub>18</sub> NO <sub>19</sub><br>Dy <sub>3</sub> | C <sub>30</sub> H <sub>18</sub> NO <sub>19</sub><br>Ho <sub>3</sub> | C <sub>30</sub> H <sub>18</sub> NO <sub>19</sub><br>Er <sub>3</sub> |
| Formula weight                            | 963.18                                                             | 1168.20                                                             | 1173.25                                                             | 1183.96                                                             | 1191.24                                                             | 1198.23                                                             |
| Temperature / K                           | 293(2)                                                             | 145(2)                                                              | 104(4)                                                              | 102(1)                                                              | 102(2)                                                              | 104(2)                                                              |
| Wavelength / Å                            | 1.54184                                                            | 1.54184                                                             | 1.54184                                                             | 1.54184                                                             | 1.54184                                                             | 1.54184                                                             |
| Crystal system                            | Monoclinic                                                         | Monoclinic                                                          | Monoclinic                                                          | Monoclinic                                                          | Monoclinic                                                          | Monoclinic                                                          |
| Space group                               | <i>C</i> 2/ <i>m</i>                                               | <i>C</i> 2/ <i>m</i>                                                | <i>C</i> 2/ <i>m</i>                                                | <i>C</i> 2/ <i>m</i>                                                | <i>C</i> 2/ <i>m</i>                                                | <i>C</i> 2/ <i>m</i>                                                |
| a / Å                                     | 29.6715(3)                                                         | 30.1356(7)                                                          | 29.8060(8)                                                          | 29.9207(7)                                                          | 29.5465(5)                                                          | 29.7195(6)                                                          |
| b / Å                                     | 18.3115(2)                                                         | 18.2215(7)                                                          | 18.4881(7)                                                          | 18.2577(5)                                                          | 18.6021(4)                                                          | 18.1534(5)                                                          |
| c / Å                                     | 14.5989(1)                                                         | 14.6429(4)                                                          | 14.6432(4)                                                          | 14.6257(4)                                                          | 14.5637(3)                                                          | 14.5912(3)                                                          |
| α = γ / °                                 | 90                                                                 | 90                                                                  | 90                                                                  | 90                                                                  | 90                                                                  | 90                                                                  |
| β / °                                     | 101.951 (1)                                                        | 100.531(2)                                                          | 100.960(3)                                                          | 100.432(2)                                                          | 102.304(2)                                                          | 101.482(2)                                                          |
| Volume / Å <sup>3</sup>                   | 7760.1(2)                                                          | 7905.2(4)                                                           | 7922.0(4)                                                           | 7857.7(4)                                                           | 7820.7(3)                                                           | 7714.6(3)                                                           |
| Z                                         | 4                                                                  | 4                                                                   | 4                                                                   | 4                                                                   | 4                                                                   | 4                                                                   |
| d <sub>calc.</sub> / g/cm <sup>3</sup>    | 0.824                                                              | 0.982                                                               | 0.984                                                               | 1.001                                                               | 1.012                                                               | 1.032                                                               |
| Absorption coefficient / mm <sup>-1</sup> | 3.276                                                              | 16.377                                                              | 13.269                                                              | 15.362                                                              | 5.767                                                               | 6.158                                                               |
| F(000)                                    | 1896                                                               | 2196                                                                | 2113                                                                | 2119                                                                | 2232                                                                | 2244                                                                |
| Reflections collected                     | 42780                                                              | 46765                                                               | 27095                                                               | 27408                                                               | 25371                                                               | 24940                                                               |
| Independent reflections                   | 7147                                                               | 7281                                                                | 7291                                                                | 7238                                                                | 7197                                                                | 7115                                                                |
| Completeness to θ = 66.99°                | 99.7%<br>[R <sub>int</sub> = 0.0399]                               | 100%<br>[R <sub>int</sub> = 0.0755]                                 | 99.9%<br>[R <sub>int</sub> = 0.0566]                                | 99.9%<br>[R <sub>int</sub> = 0.0474]                                | 99.8%<br>[R <sub>int</sub> = 0.0344]                                | 99.8%<br>[R <sub>int</sub> = 0.0225]                                |
| Data / restraints / parameters            | 7147/17/248                                                        | 7281/23/247                                                         | 7291/22/247                                                         | 7238/22/247                                                         | 7197/22/247                                                         | 7115/4/247                                                          |
| Goodness-of-fit                           | 1.086                                                              | 0.958                                                               | 0.994                                                               | 0.984                                                               | 1.093                                                               | 1.116                                                               |
| Final R indices [I > 2σ(I)]               | R <sub>1</sub> = 0.0609,<br>wR <sub>2</sub> = 0.1938               | R <sub>1</sub> = 0.0668,<br>wR <sub>2</sub> = 0.1937                | R <sub>1</sub> = 0.0597,<br>wR <sub>2</sub> = 0.1729                | R <sub>1</sub> = 0.0519,<br>wR <sub>2</sub> = 0.1508                | R <sub>1</sub> = 0.0511,<br>wR <sub>2</sub> = 0.1626                | R <sub>1</sub> = 0.0436,<br>wR <sub>2</sub> = 0.1412                |
| R indices [all data]                      | R <sub>1</sub> = 0.0640,<br>wR <sub>2</sub> = 0.1988               | R <sub>1</sub> = 0.0836,<br>wR <sub>2</sub> = 0.2059                | R <sub>1</sub> = 0.0653,<br>wR <sub>2</sub> = 0.1809                | R <sub>1</sub> = 0.0593,<br>wR <sub>2</sub> = 0.1594                | R <sub>1</sub> = 0.0559,<br>wR <sub>2</sub> = 0.1680                | R <sub>1</sub> = 0.0463,<br>wR <sub>2</sub> = 0.1437                |

**Table S3:** Selected Crystal Data for compounds **UCY-17(Tb)/L**.

| Compound                                  | UCY-17(Tb)/BDC                                                  | UCY-17(Tb)/ABDC                                                  | UCY-17(Tb)/FBDC                                                  | UCY-17(Tb)/NDC                                                  |
|-------------------------------------------|-----------------------------------------------------------------|------------------------------------------------------------------|------------------------------------------------------------------|-----------------------------------------------------------------|
| Empirical formula                         | C <sub>34</sub> H <sub>20</sub> O <sub>18</sub> Tb <sub>3</sub> | C <sub>68</sub> H <sub>41</sub> NO <sub>36</sub> Tb <sub>6</sub> | C <sub>68</sub> H <sub>39</sub> FO <sub>36</sub> Tb <sub>6</sub> | C <sub>36</sub> H <sub>20</sub> O <sub>18</sub> Tb <sub>3</sub> |
| Formula weight                            | 1193.26                                                         | 2401.54                                                          | 2404.51                                                          | 1217.28                                                         |
| Temperature / K                           | 100(2)                                                          | 100(2)                                                           | 100(2)                                                           | 100(1)                                                          |
| Wavelength / Å                            | 1.54184                                                         | 1.54184                                                          | 1.54184                                                          | 1.54184                                                         |
| Crystal system                            | Monoclinic                                                      | Monoclinic                                                       | Monoclinic                                                       | Monoclinic                                                      |
| Space group                               | <i>C</i> 2/ <i>m</i>                                            | <i>C</i> 2/ <i>m</i>                                             | <i>C</i> 2/ <i>m</i>                                             | <i>C</i> 2/ <i>m</i>                                            |
| a / Å                                     | 29.812(2)                                                       | 29.609(2)                                                        | 29.7002(6)                                                       | 18.795(2)                                                       |
| b / Å                                     | 18.891(3)                                                       | 18.616(1)                                                        | 18.5497(6)                                                       | 29.712(2)                                                       |
| c / Å                                     | 14.834(2)                                                       | 14.9895(5)                                                       | 14.9529(3)                                                       | 15.479(2)                                                       |
| α = γ / °                                 | 90                                                              | 90                                                               | 90                                                               | 90                                                              |
| β / °                                     | 100.85(1)                                                       | 99.990(4)                                                        | 100.273(2)                                                       | 102.31(1)                                                       |
| Volume / Å <sup>3</sup>                   | 8205 (2)                                                        | 8137.0(6)                                                        | 8106.0(4)                                                        | 8445(2)                                                         |
| Z                                         | 4                                                               | 2                                                                | 2                                                                | 4                                                               |
| d <sub>calc.</sub> / g/cm <sup>3</sup>    | 0.966                                                           | 0.980                                                            | 0.985                                                            | 0.957                                                           |
| Absorption coefficient / mm <sup>-1</sup> | 12.804                                                          | 12.915                                                           | 12.973                                                           | 12.448                                                          |
| F(000)                                    | 2252                                                            | 2268                                                             | 2268                                                             | 2300                                                            |
| Reflections collected                     | 24220                                                           | 17541                                                            | 27258                                                            | 16388                                                           |
| Independent reflections                   | 7508                                                            | 7448                                                             | 7466                                                             | 7626                                                            |
| Completeness to θ = 66.99°                | 99.3%<br>[R <sub>int</sub> = 0.1156]                            | 99.5%<br>[R <sub>int</sub> = 0.0508]                             | 99.9%<br>[R <sub>int</sub> = 0.0552]                             | 99.2%<br>[R <sub>int</sub> = 0.0813]                            |
| Data / restraints / parameters            | 7508/298/232                                                    | 7448/132/251                                                     | 7466/45/254                                                      | 7626/279/290                                                    |
| Goodness-of-fit                           | 0.982                                                           | 0.954                                                            | 1.048                                                            | 1.070                                                           |
| Final R indices [I > 2σ(I)]               | R <sub>1</sub> = 0.1038,<br>wR <sub>2</sub> = 0.2865            | R <sub>1</sub> = 0.0903,<br>wR <sub>2</sub> = 0.2392             | R <sub>1</sub> = 0.0893,<br>wR <sub>2</sub> = 0.2429             | R <sub>1</sub> = 0.1170,<br>wR <sub>2</sub> = 0.3044            |
| R indices [all data]                      | R <sub>1</sub> = 0.1302,<br>wR <sub>2</sub> = 0.3198            | R <sub>1</sub> = 0.1094,<br>wR <sub>2</sub> = 0.2502             | R <sub>1</sub> = 0.0978,<br>wR <sub>2</sub> = 0.2544             | R <sub>1</sub> = 0.1356,<br>wR <sub>2</sub> = 0.3283            |

**Physical Measurements/Characterization of UCY-17(RE) (RE: Y, Gd, Tb, Dy, Ho, Er)**

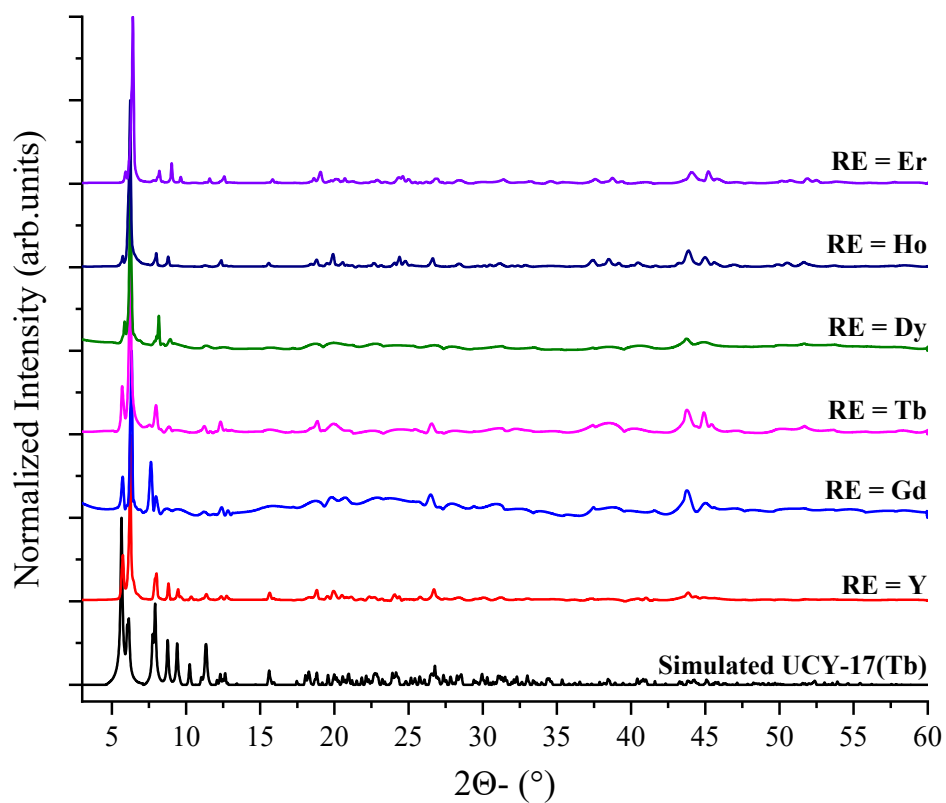

**Figure S1:** Powder X-ray diffraction patterns of the as synthesized compounds UCY-17(RE) along with the simulated pattern of UCY-17(Tb) from the single crystal data.

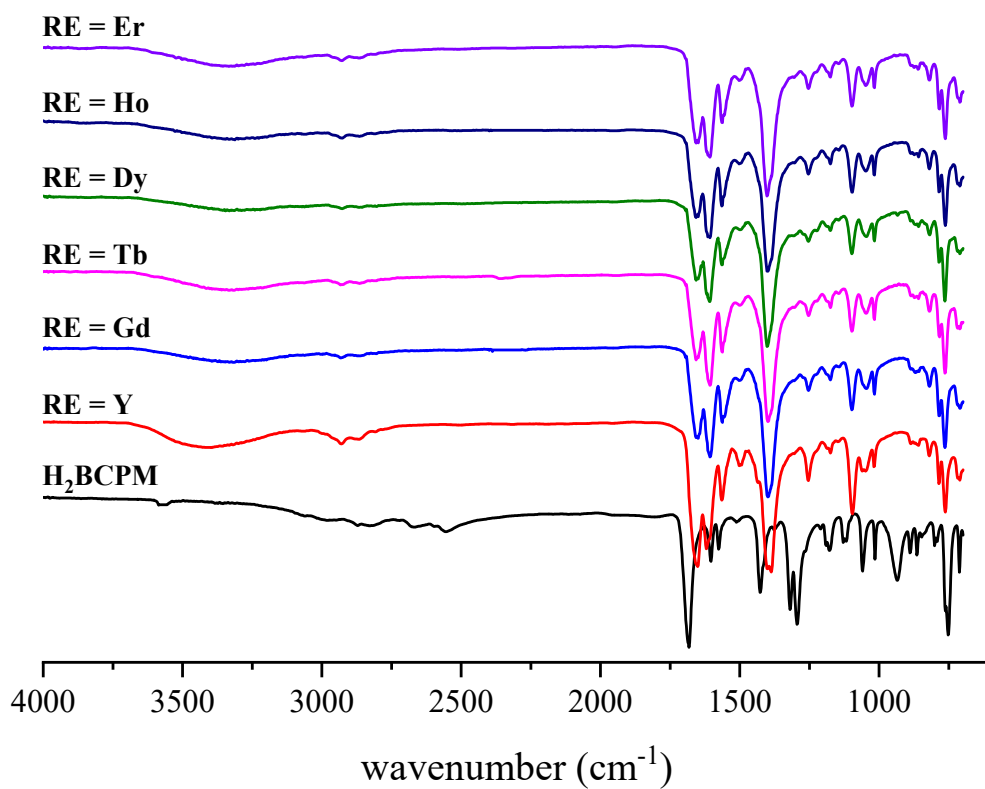

**Figure S2:** IR spectra of H<sub>2</sub>BCPM ligand and the as synthesized compounds UCY-17(RE).



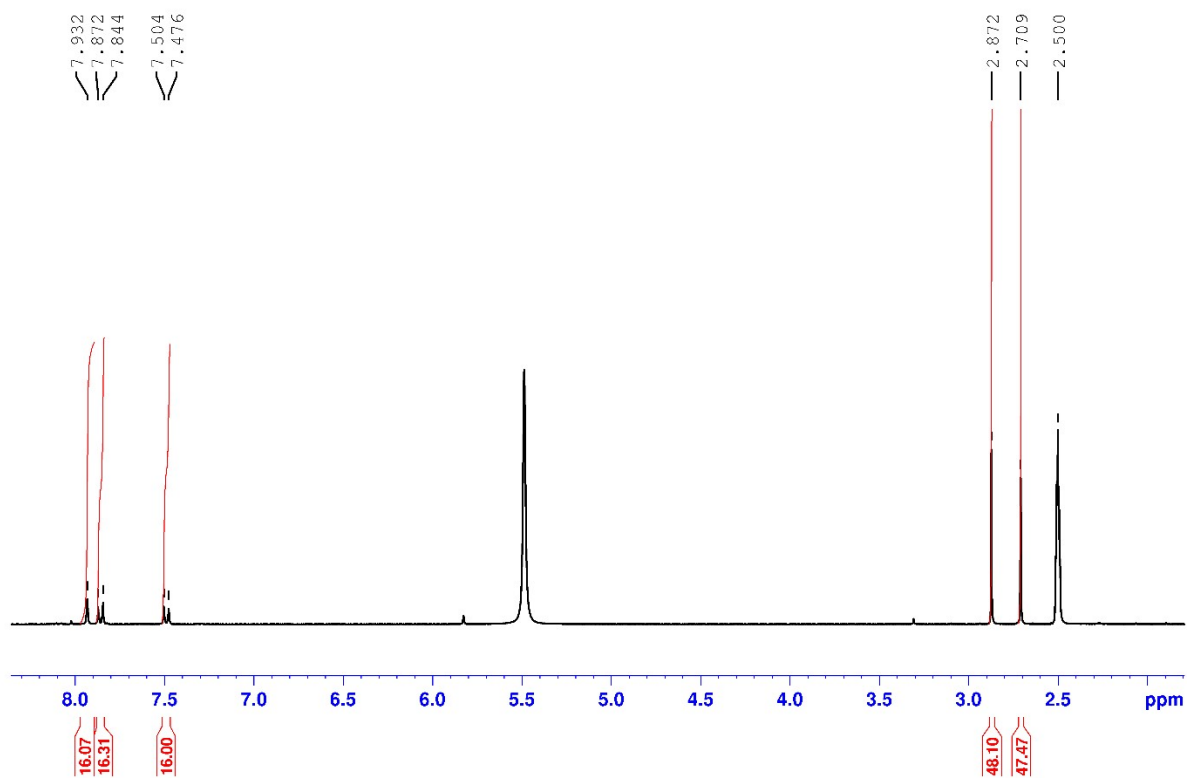

**Figure S3:**  $^1\text{H}$ -NMR spectrum of as synthesized **UCY-17(Y)** digested in  $d_6$ -DMSO. These data indicate the presence of the organic ligand  $\text{BCPM}^{2-}$  as well as DMF molecules in **UCY-17(Y)**.  $^1\text{H}$  NMR (DMSO):  $\delta$  2.500 (t, residual solvent peaks),  $\delta$  2.709 (s, 3H,  $\text{CH}_3$ , DMF),  $\delta$  2.872 (s, 3H,  $\text{CH}_3$ , DMF),  $\delta$  7.932 (s, H,  $\text{CHO}$ , DMF),  $\delta$  7.476-7.504 (d, 4H, Ar-H,  $\text{BCPM}^{2-}$ ),  $\delta$  7.844 – 7.872 (d, 4H, Ar-H,  $\text{BCPM}^{2-}$ ).

**Determination of the amount of F<sup>-</sup> anions per (Gd<sup>3+</sup>)<sub>6</sub> SBU in bulk UCY-17(Gd) microcrystalline powder:** In order to quantify the amount of F<sup>-</sup> anions per (Re<sup>3+</sup>)<sub>6</sub> SBU <sup>19</sup>Fq-NMR measurements were performed. For this purpose, a trifluoroacetic acid (TFA) solution in D<sub>2</sub>O was used as an external standard. Prior the <sup>19</sup>Fq-NMR experiment, the concentration of the trifluoroacetic acid (TFA) solution was determined using NaF solutions with known concentration. Afterwards microcrystalline powder of UCY-17(Gd) (~ 10 – 15mg in each experiment) was digested in a 0.5M KOH solution in D<sub>2</sub>O and then 500 μL of the resulting solution was transferred to the NMR tube along with the microprobe tube containing the external standard (the known concentration trifluoroacetic acid (TFA) solution). The experiment was repeated three times.<sup>1,2</sup>

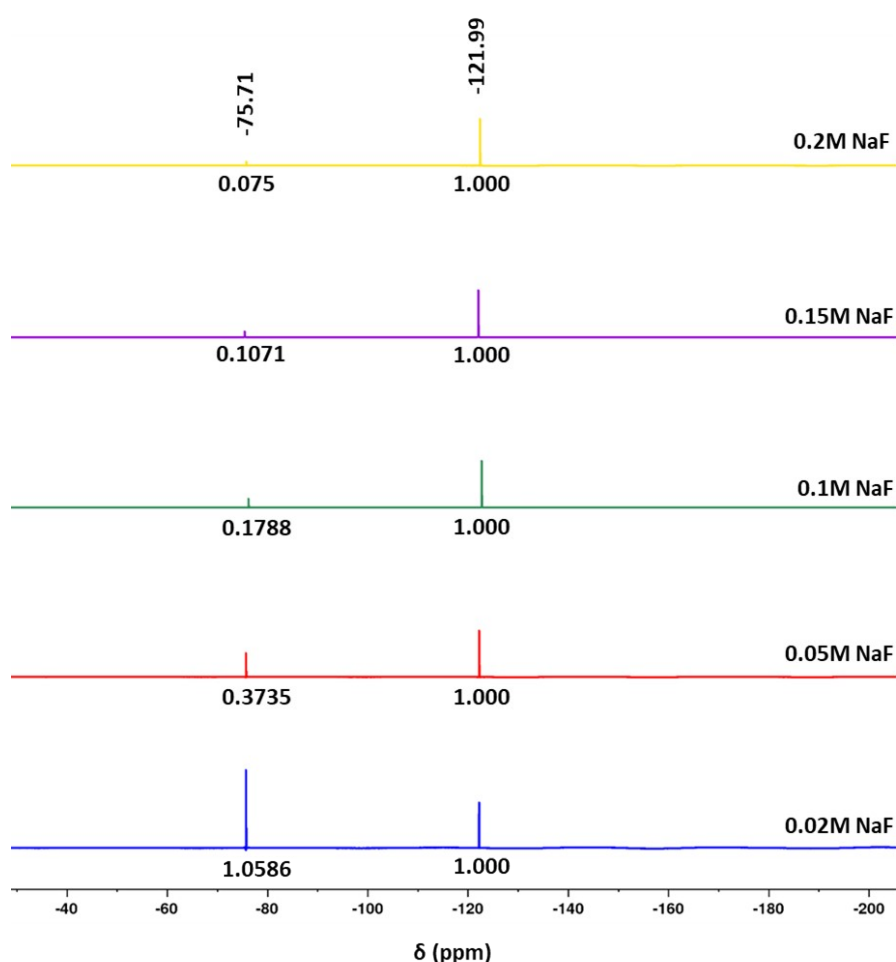

**Figure S4:** <sup>19</sup>Fq-NMR calibration spectra of the TFA solution external standard using NaF solutions of known concentration. TFA concentration was found equal to 5.9 ± 0.8mM. <sup>19</sup>F NMR (D<sub>2</sub>O): δ -75.71 (TFA), δ -121.99 (F<sup>-</sup>).

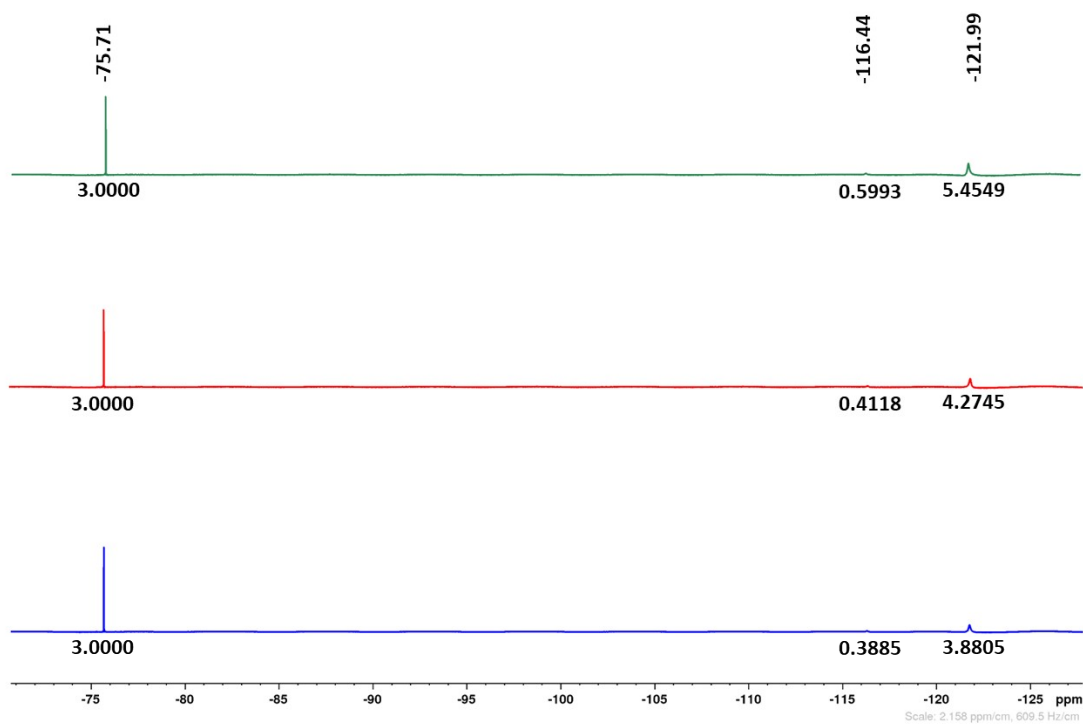

**Figure S5:**  $^{19}\text{F}$ -NMR spectra of as synthesized **UCY-17(Gd)** digested in 0.5M KOH in  $\text{D}_2\text{O}$  along with the TFA solution (external standard). These studies indicated that **UCY-17(Gd)** contains  $\sim 1.6 \pm 0.12$  F $^-$  anions /  $(\text{Gd}^{3+})_6$ SBU.  $^{19}\text{F}$  NMR ( $\text{D}_2\text{O}$ ):  $\delta -75.71$  (TFA),  $\delta -116.44$  (FBA $^-$ ),  $\delta -121.99$  (F $^-$ ).

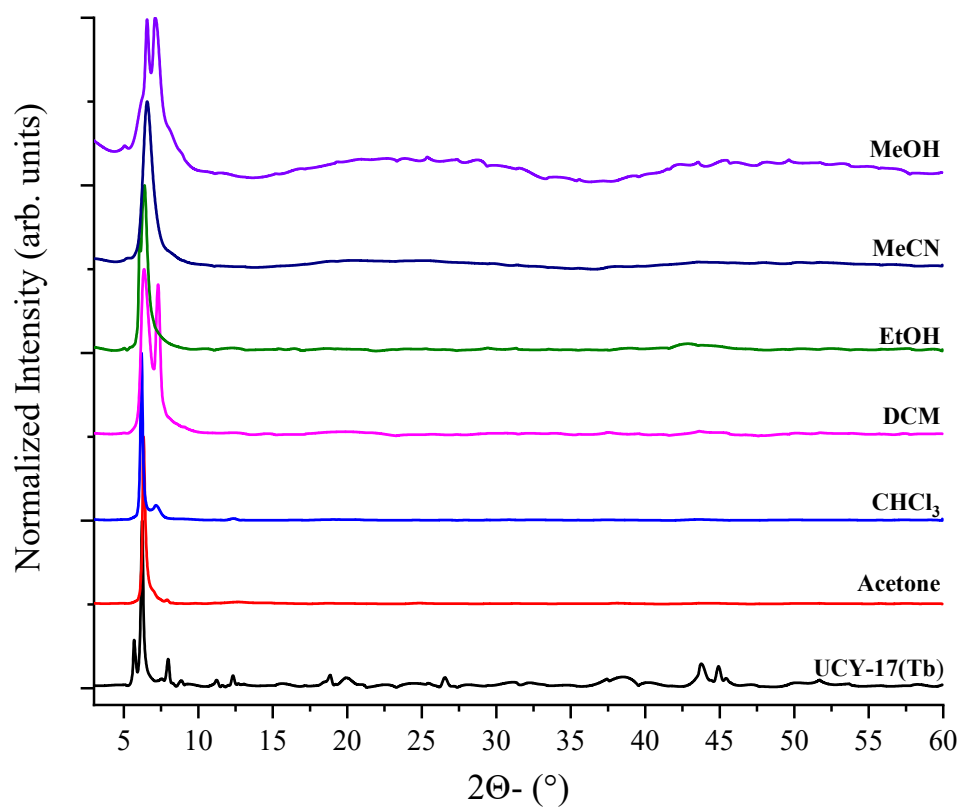

**Figure S6:** Powder X-ray diffraction patterns of as synthesized **UCY-17(Tb)** treated in various organic solvents for 10 days.

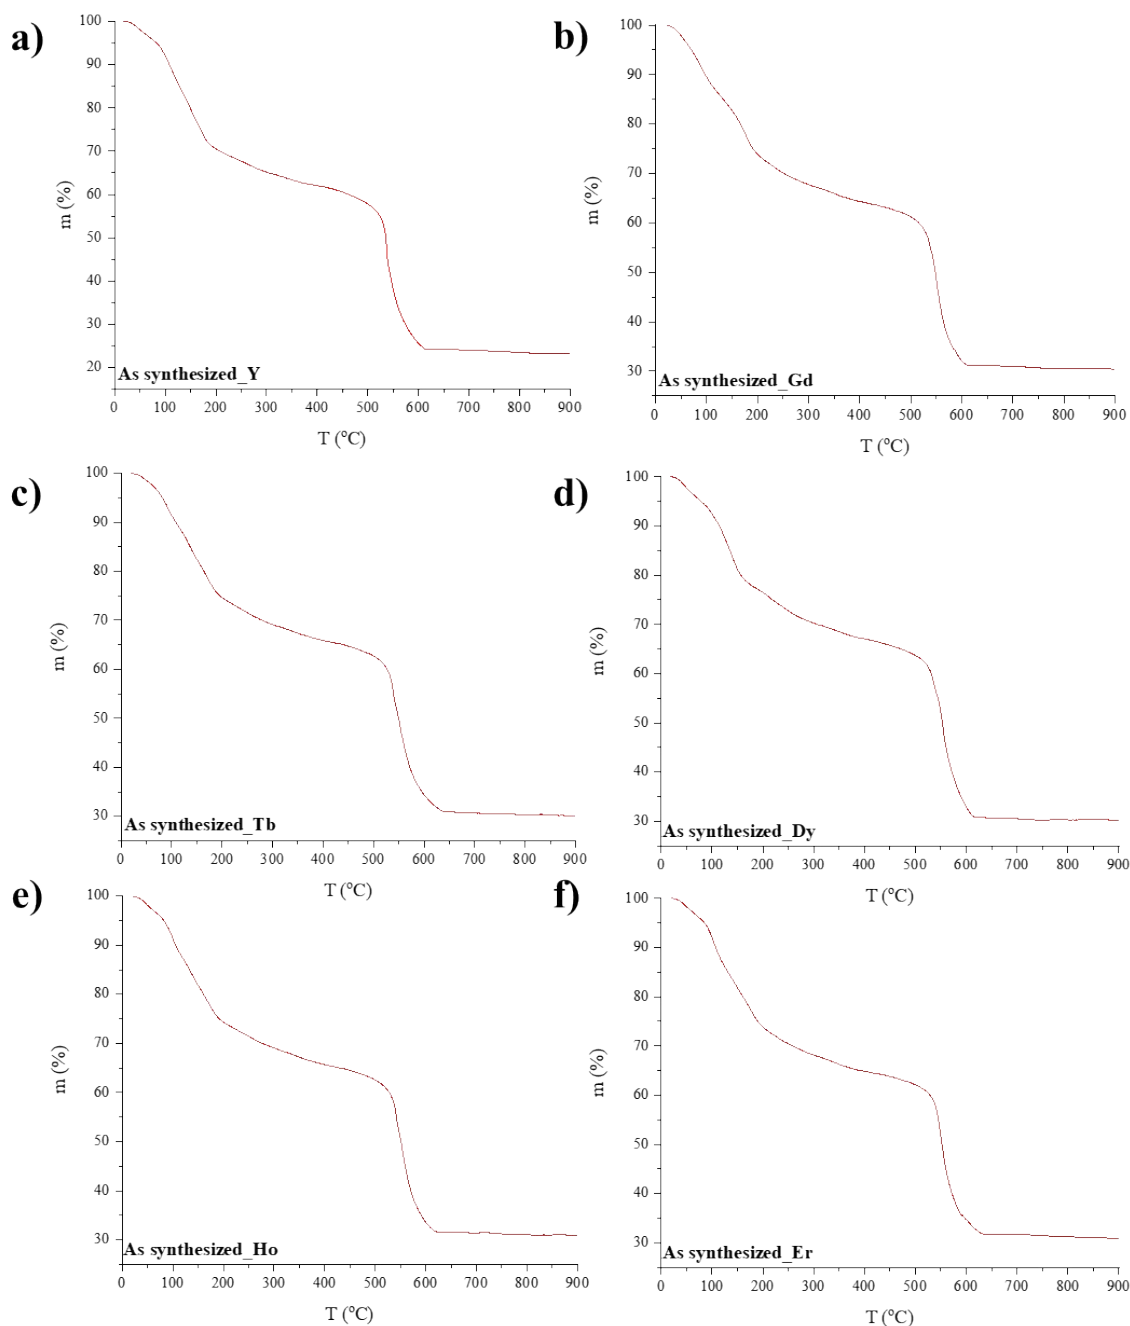

**Figure S7:** TGA graphs of the as synthesized compounds **UCY-17(RE)** (a) RE = Y, (b) RE = Gd, (c) RE = Tb, (d) RE = Dy, (e) RE = Ho, (f) RE = Er). TG analysis reveals that the thermal decomposition of compounds **UCY-17(RE)** proceeds via a two-step process. The first step (until  $\sim 400\text{-}450^\circ\text{C}$ ) is attributed to the removal of the terminal water molecules and lattice DMF molecules. The second mass loss which is completed at  $\sim 620\text{-}640^\circ\text{C}$  is attributed to the decomposition of the ligand BCPM<sup>2-</sup>. Lastly the residual mass at  $900^\circ\text{C}$  corresponds to the rare earth oxide of the corresponding RE<sup>III</sup> ion. Details on calculated values for solvent removal and ligand decomposition along with the experimental values obtained from TG analysis are shown in [Table S4](#).

**Table S4:** Calculated values for solvent removal and ligand combustion along with the experimental values obtained from TG analysis for the synthesized compounds **UCY-17(RE)**.

| Compound          | Lattice Solvent Removal |                               |      | Ligand Combustion |                               | Residual Oxide   |                               |                                |
|-------------------|-------------------------|-------------------------------|------|-------------------|-------------------------------|------------------|-------------------------------|--------------------------------|
|                   | Temperature (°C)        | Experimental (Calculated) (%) | xDMF | Temperature (°C)  | Experimental (Calculated) (%) | Temperature (°C) | Experimental (Calculated) (%) | Formula                        |
| <b>UCY-17(Y)</b>  | r.t. - 450              | 40 (40)                       | 16   | 450 – 620         | 37 (38)                       | 900              | 23 (22)                       | Y <sub>2</sub> O <sub>3</sub>  |
| <b>UCY-17(Gd)</b> | r.t. - 450              | 37 (37)                       | 17   | 450 – 620         | 32 (33)                       | 900              | 31 (30)                       | Gd <sub>2</sub> O <sub>3</sub> |
| <b>UCY-17(Tb)</b> | r.t. - 450              | 36 (35)                       | 16   | 450 - 640         | 34 (33)                       | 900              | 30 (32)                       | Tb <sub>4</sub> O <sub>7</sub> |
| <b>UCY-17(Dy)</b> | r.t. – 450              | 34 (34)                       | 15   | 450 - 620         | 35 (34)                       | 900              | 31 (32)                       | Dy <sub>2</sub> O <sub>3</sub> |
| <b>UCY-17(Ho)</b> | r.t. - 450              | 36 (36)                       | 17   | 450 - 620         | 33 (33)                       | 900              | 31 (31)                       | Ho <sub>2</sub> O <sub>3</sub> |
| <b>UCY-17(Er)</b> | r.t. - 450              | 36 (36)                       | 17   | 450 - 630         | 32 (33)                       | 900              | 32 (31)                       | Er <sub>2</sub> O <sub>3</sub> |

**Physical Measurements/Characterization of UCY-17( $\text{Eu}_{0.05}\text{Tb}_{0.95}$ ) and UCY-17(RE)/L; RE= Gd, Tb,  $\text{Eu}_{0.05}\text{Tb}_{0.95}$ , L=BDC<sup>2-</sup>, ABDC<sup>2-</sup>, FBDC<sup>2-</sup>, NDC<sup>2-</sup>**

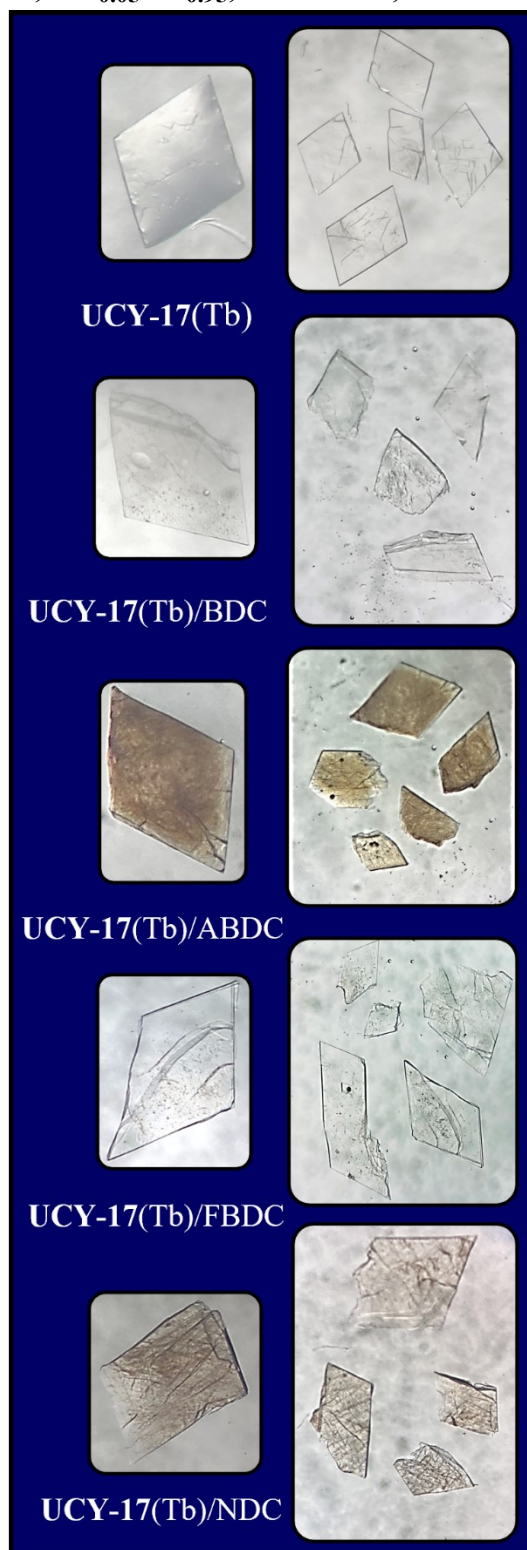

**Figure S8:** Stereoscope images of the crystals of UCY-17(Tb), UCY-17(Tb)/L; L= BDC<sup>2-</sup>, ABDC<sup>2-</sup>, FBDC<sup>2-</sup>, NDC<sup>2-</sup>.

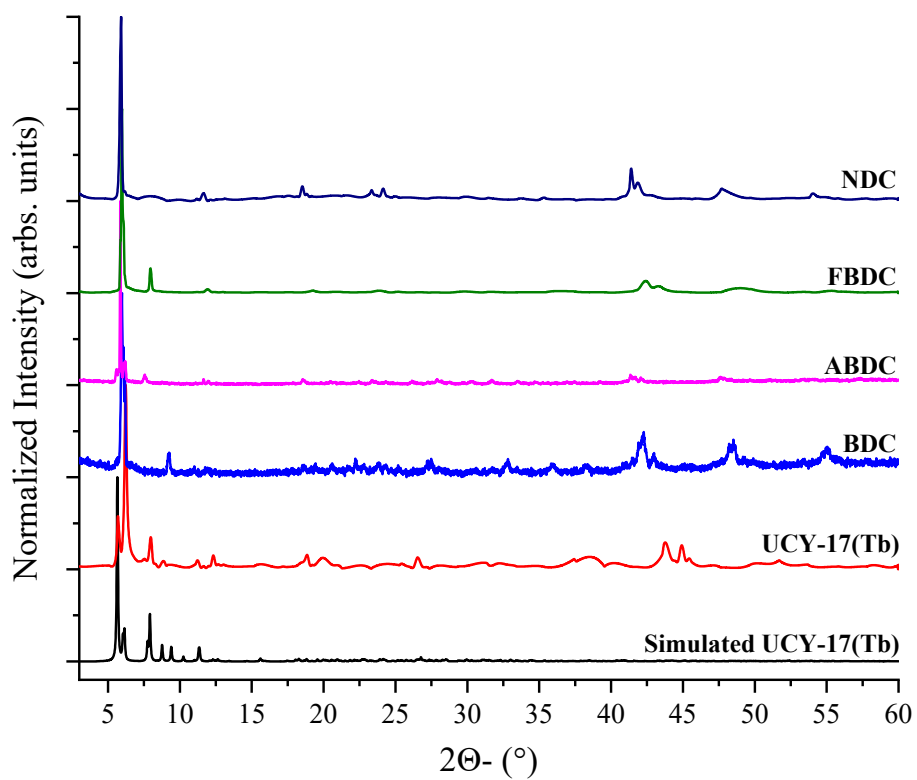

**Figure S9:** Powder X-ray diffraction patterns of UCY-17(Tb) and the exchanged analogues UCY-17(Tb)/L (L = BDC<sup>2-</sup>, ABDC<sup>2-</sup>, FBDC<sup>2-</sup> and NDC<sup>2-</sup>) along with the simulated pattern of UCY-17(Tb) from the single crystal data.



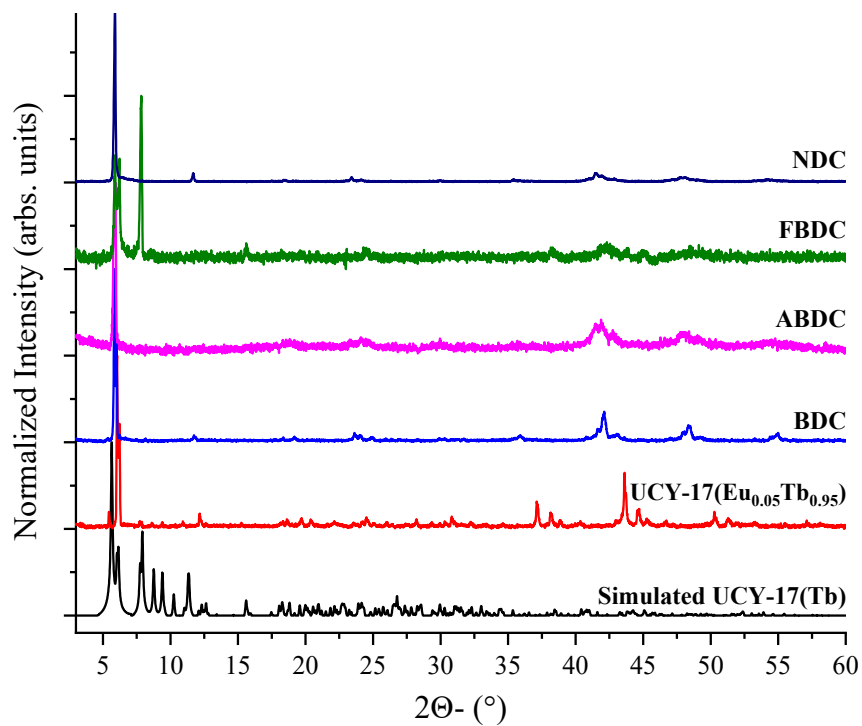

**Figure S10:** Powder X-ray diffraction patterns of the pristine MOF **UCY-17(Eu<sub>0.05</sub>Tb<sub>0.95</sub>)** and the exchanged analogues **UCY-17(Eu<sub>0.05</sub>Tb<sub>0.95</sub>)/L** (L = BDC<sup>2-</sup>, ABDC<sup>2-</sup>, FBDC<sup>2-</sup> and NDC<sup>2-</sup>) along with the simulated pattern of **UCY-17(Tb)** from the single crystal data.

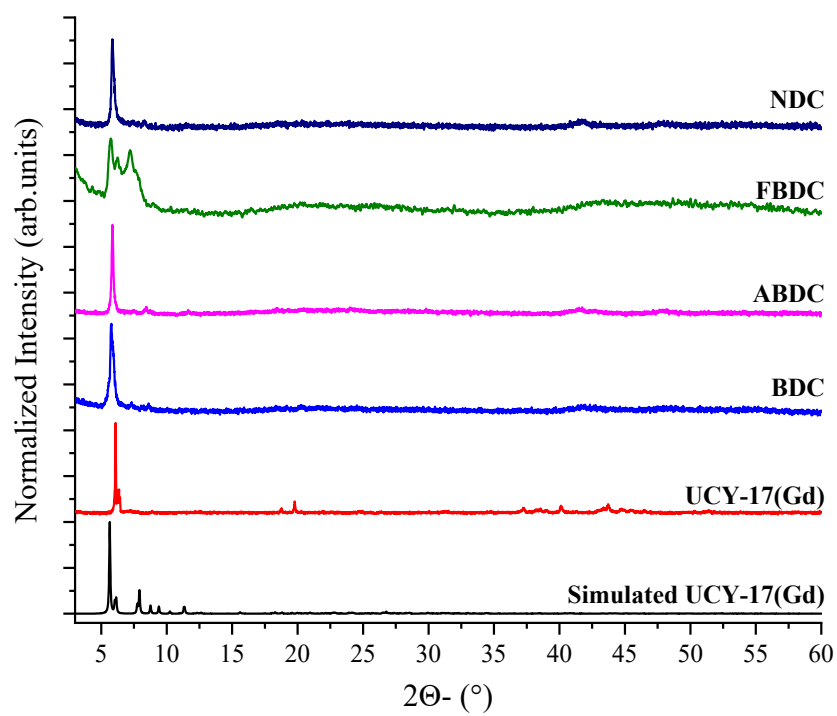

**Figure S11:** Powder X-ray diffraction patterns of the exchanged analogues UCY-17(Gd)/L (L = BDC<sup>2-</sup>, ABDC<sup>2-</sup>, FBDC<sup>2-</sup> and NDC<sup>2-</sup>) along with the experimental and simulated patterns of UCY-17(Gd) from the single crystal data.

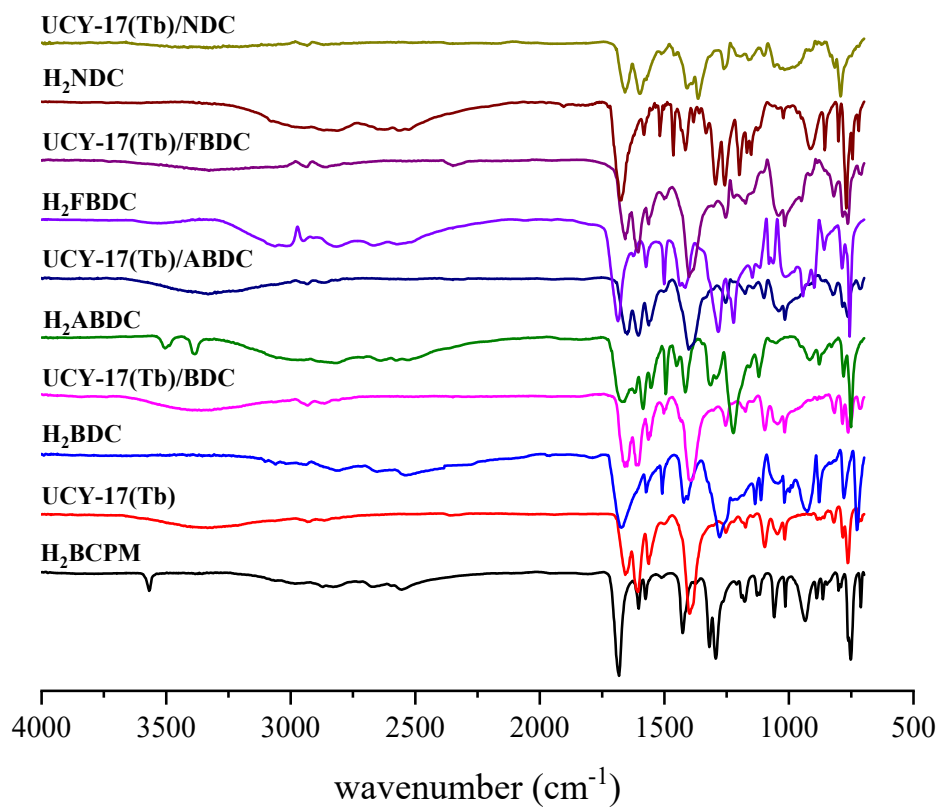

**Figure S12:** IR spectra of H<sub>2</sub>BCPM, H<sub>2</sub>BDC, H<sub>2</sub>ABDC, H<sub>2</sub>FBDC, H<sub>2</sub>NDC ligands, the pristine MOF UCY-17(Tb) and the exchanged analogues UCY-17(Tb)/L (L = BDC<sup>2-</sup>, ABDC<sup>2-</sup>, FBDC<sup>2-</sup> and NDC<sup>2-</sup>).

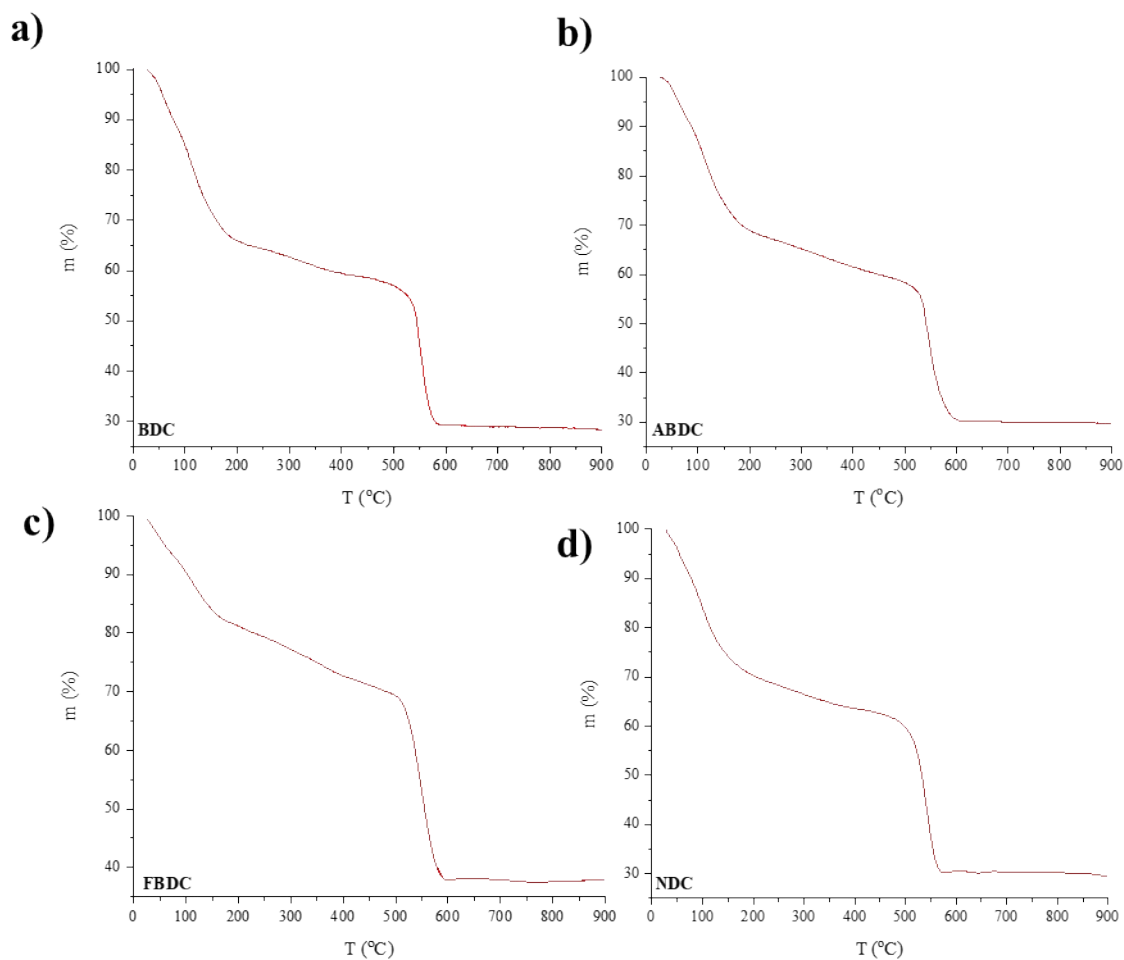

**Figure S13:** TGA graphs of the exchanged analogues **UCY-17(Tb)/L** ( $L = \text{BDC}^{2-}$ ,  $\text{ABDC}^{2-}$ ,  $\text{FBDC}^{2-}$  and  $\text{NDC}^{2-}$ ). TG analysis reveals that the thermal decomposition of compounds **UCY-17(Tb)/L** proceeds via a two-step process. The first step (until  $\sim 400\text{--}450^\circ\text{C}$ ) is attributed to the removal of the terminal water molecules and lattice DMF molecules. The second mass loss which is completed at  $\sim 600^\circ\text{C}$  for **UCY-17(Tb)/L** is attributed to the decomposition of the ligands  $\text{BCPM}^{2-}$  and  $L^{2-}$ . Lastly the residual mass at  $900^\circ\text{C}$  corresponds to  $\text{Tb}_4\text{O}_7$ . Details on calculated values for solvent removal and ligand decomposition along with the experimental values obtained from TG analysis are shown in [Table S5](#).

**Table S5:** Calculated values for solvent removal and ligand combustion along with the experimental values obtained from TG analysis for the

| Compound        | Lattice Solvent Removal |                               |      | Ligand Combustion |                               | Residual Oxide   |                               |                                |
|-----------------|-------------------------|-------------------------------|------|-------------------|-------------------------------|------------------|-------------------------------|--------------------------------|
|                 | Temperature (°C)        | Experimental (Calculated) (%) | xDMF | Temperature (°C)  | Experimental (Calculated) (%) | Temperature (°C) | Experimental (Calculated) (%) | Formula                        |
| UCY-17(Tb)/BDC  | r.t. - 450              | 41 (42)                       | 22   | 450 - 600         | 30 (30)                       | 900              | 29 (28)                       | Tb <sub>4</sub> O <sub>7</sub> |
| UCY-17(Tb)/ABDC | r.t. - 450              | 39 (39)                       | 20   | 450 - 600         | 31 (30)                       | 900              | 30 (29)                       | Tb <sub>4</sub> O <sub>7</sub> |
| UCY-17(Tb)/FBDC | r.t. - 400              | 27 (27)                       | 11   | 400 - 600         | 36 (38)                       | 900              | 37 (35)                       | Tb <sub>4</sub> O <sub>7</sub> |
| UCY-17(Tb)-NDC  | r.t. - 450              | 37 (38)                       | 19   | 450 - 600         | 33 (33)                       | 900              | 30 (29)                       | Tb <sub>4</sub> O <sub>7</sub> |

exchanged analogues UCY-17(Tb)/L (L = BDC<sup>2-</sup>, ABDC<sup>2-</sup>, FBDC<sup>2-</sup> and NDC<sup>2-</sup>)

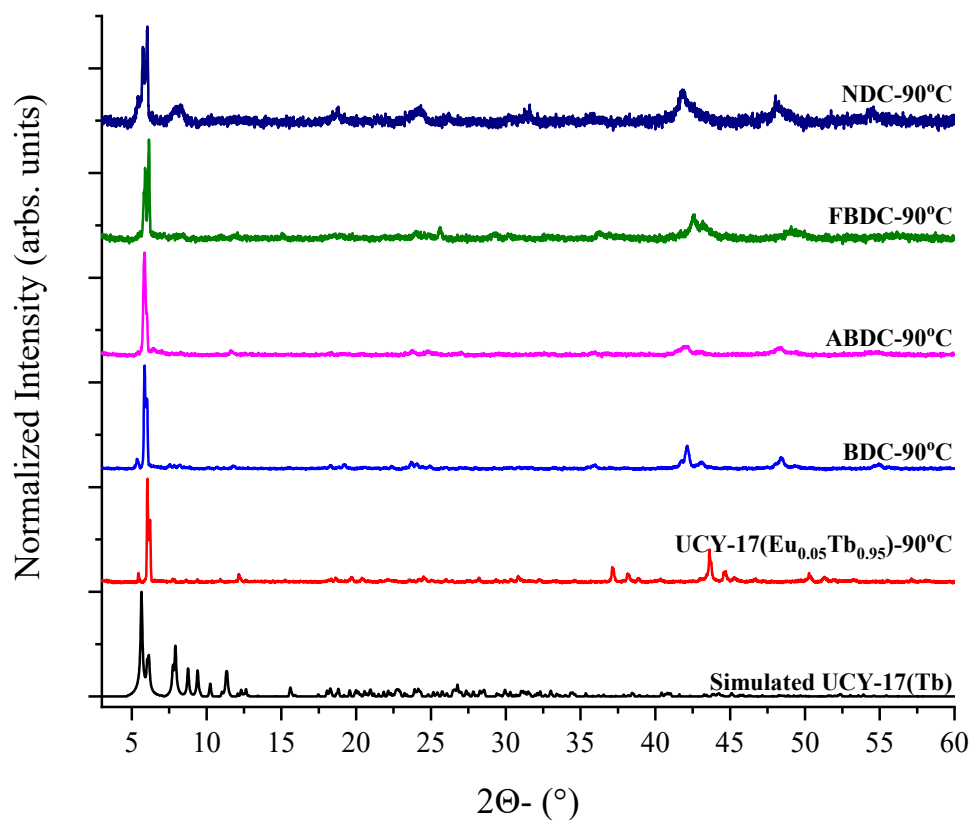

**Figure S14:** Powder X-ray diffraction patterns of the exchanged analogues UCY-17(Eu<sub>0.05</sub>Tb<sub>0.95</sub>)/L (L = BDC<sup>2-</sup>, ABDC<sup>2-</sup>, FBDC<sup>2-</sup> and NDC<sup>2-</sup>) along with the simulated pattern of UCY-17(Tb) from the single crystal data, after heating at 90°C (following the process described in the experimental part in the main manuscript).

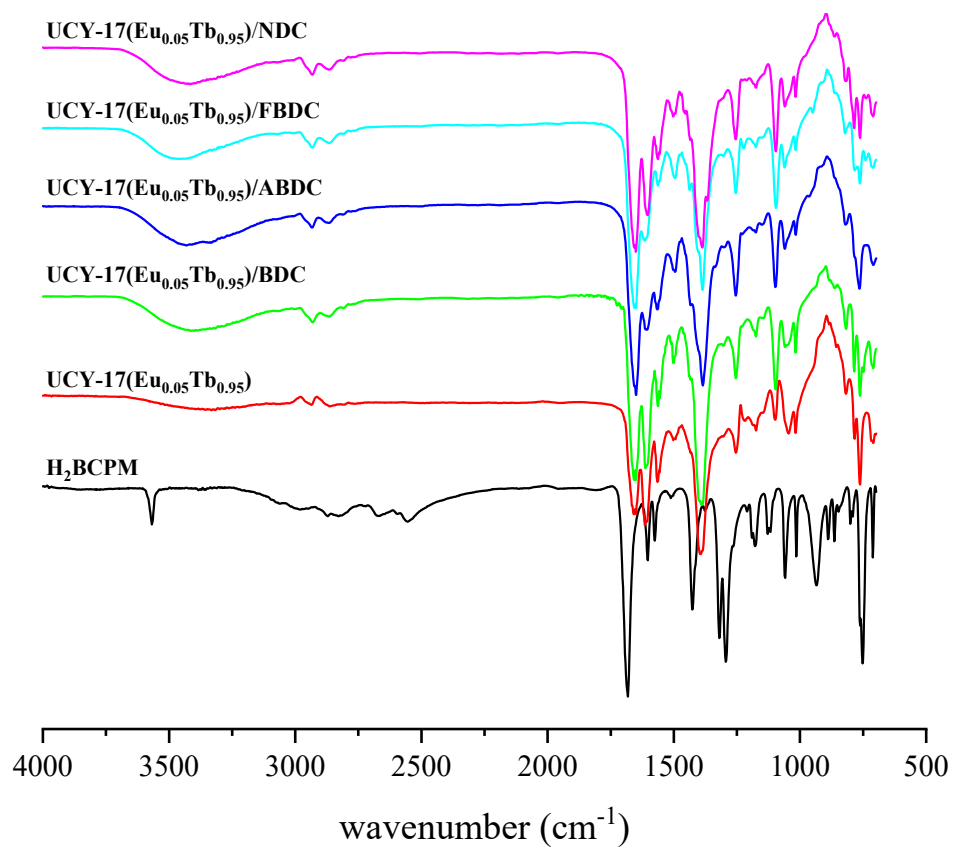

**Figure S15:** IR spectra of the pristine MOF UCY-17(Eu<sub>0.05</sub>Tb<sub>0.95</sub>) and the exchanged analogues UCY-17(Eu<sub>0.05</sub>Tb<sub>0.95</sub>)/L (L = BDC<sup>2-</sup>, ABDC<sup>2-</sup>, FBDC<sup>2-</sup> and NDC<sup>2-</sup>).

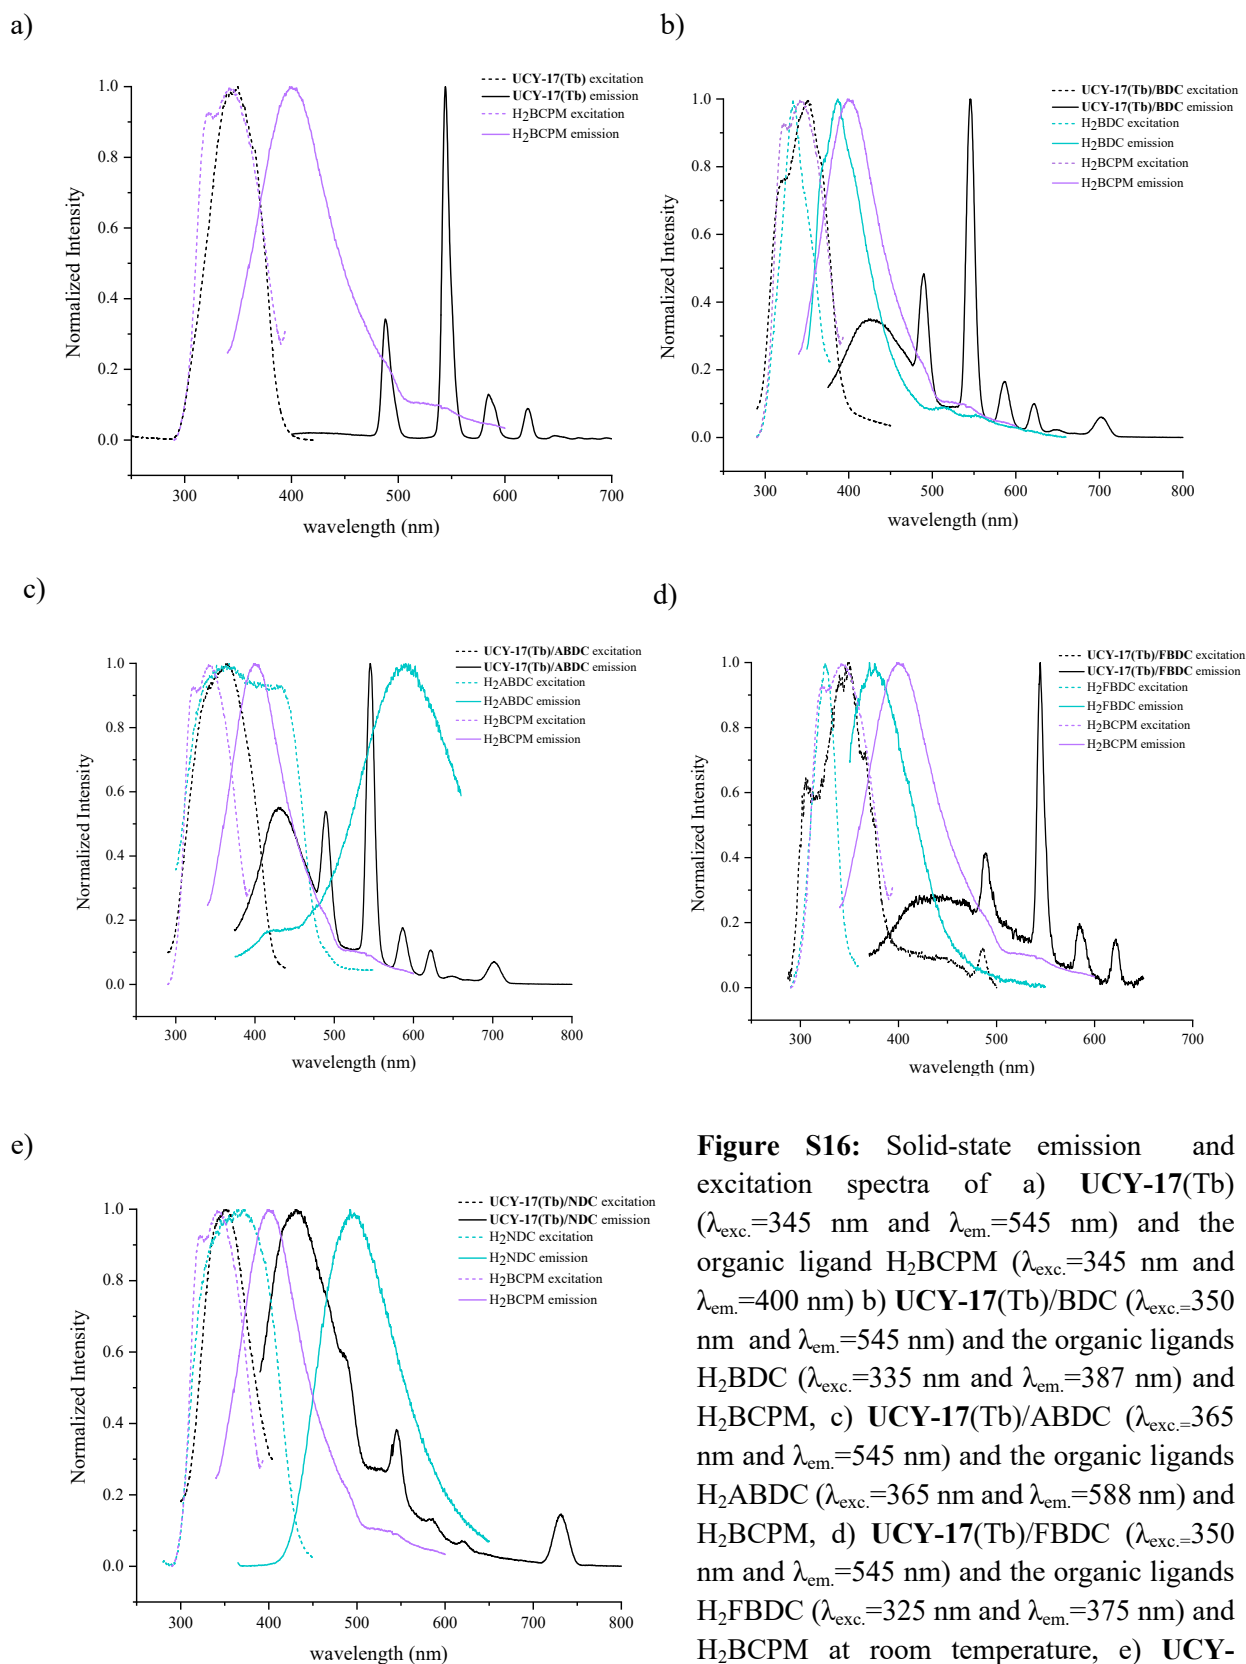

**Figure S16:** Solid-state emission and excitation spectra of a) **UCY-17(Tb)** ( $\lambda_{exc.}=345$  nm and  $\lambda_{em.}=545$  nm) and the organic ligand **H<sub>2</sub>BCPM** ( $\lambda_{exc.}=345$  nm and  $\lambda_{em.}=400$  nm) b) **UCY-17(Tb)/BDC** ( $\lambda_{exc.}=350$  nm and  $\lambda_{em.}=545$  nm) and the organic ligands **H<sub>2</sub>BDC** ( $\lambda_{exc.}=335$  nm and  $\lambda_{em.}=387$  nm) and **H<sub>2</sub>BCPM**, c) **UCY-17(Tb)/ABDC** ( $\lambda_{exc.}=365$  nm and  $\lambda_{em.}=545$  nm) and the organic ligands **H<sub>2</sub>ABDC** ( $\lambda_{exc.}=365$  nm and  $\lambda_{em.}=588$  nm) and **H<sub>2</sub>BCPM**, d) **UCY-17(Tb)/FBDC** ( $\lambda_{exc.}=350$  nm and  $\lambda_{em.}=545$  nm) and the organic ligands **H<sub>2</sub>FBDC** ( $\lambda_{exc.}=325$  nm and  $\lambda_{em.}=375$  nm) and **H<sub>2</sub>BCPM** at room temperature, e) **UCY-17(Tb)/NDC** ( $\lambda_{exc.}=350$  nm and  $\lambda_{em.}=545$  nm) and the organic ligands **H<sub>2</sub>NDC** ( $\lambda_{exc.}=365$  nm and  $\lambda_{em.}=495$  nm) and **H<sub>2</sub>BCPM**.



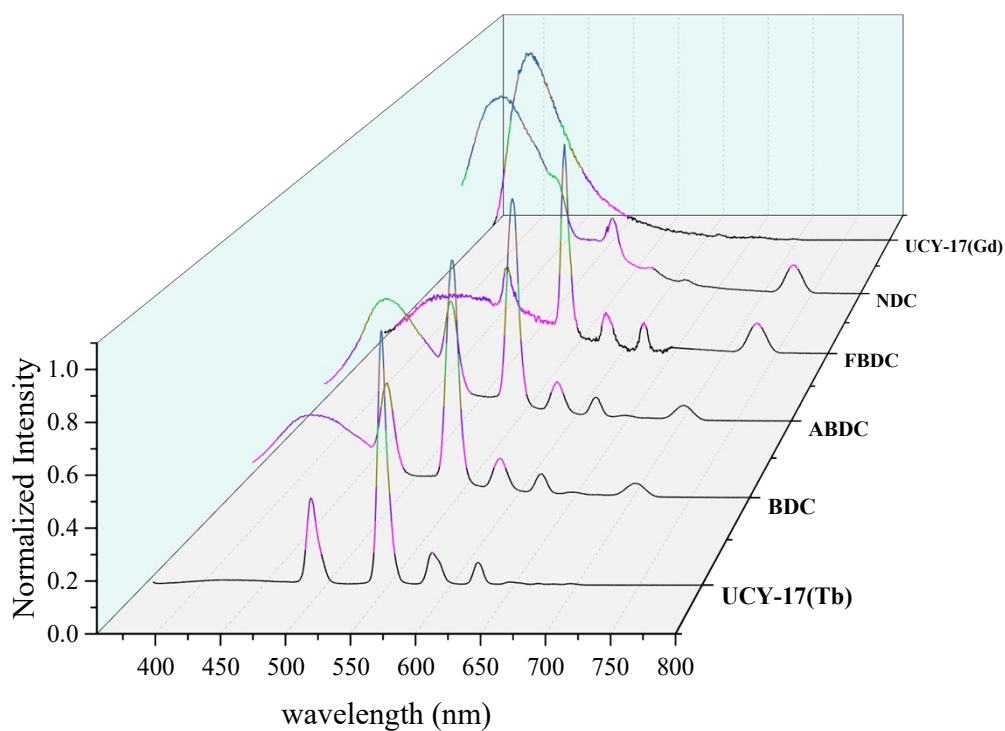

**Figure S17:** Solid-state emission spectra of compounds **UCY-17(Tb)**, **UCY-17(Tb)/L** ( $L = \text{BDC}^{2-}$ ,  $\text{ABDC}^{2-}$ ,  $\text{FBDC}^{2-}$ ,  $\text{NDC}^{2-}$ ) and **UCY-17(Gd)** with  $\lambda_{\text{exc}} \sim 350$  nm.

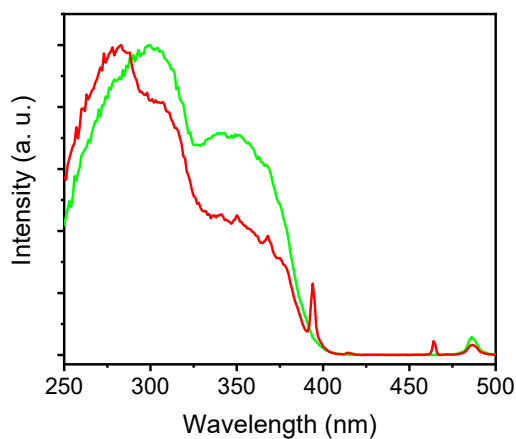

**Figure S18:** Room temperature excitation spectra of the pristine **UCY-17(Eu<sub>0.05</sub>Tb<sub>0.95</sub>)** MOF monitoring the transitions  ${}^5\text{D}_0 \leftrightarrow {}^7\text{F}_2$  of  $\text{Eu}^{3+}$  (red solid line,  $\lambda_{\text{em}} = 614$  nm) and  ${}^5\text{D}_4 \leftrightarrow {}^7\text{F}_5$  of  $\text{Tb}^{3+}$  (green solid line,  $\lambda_{\text{em}} = 543$  nm) ions.

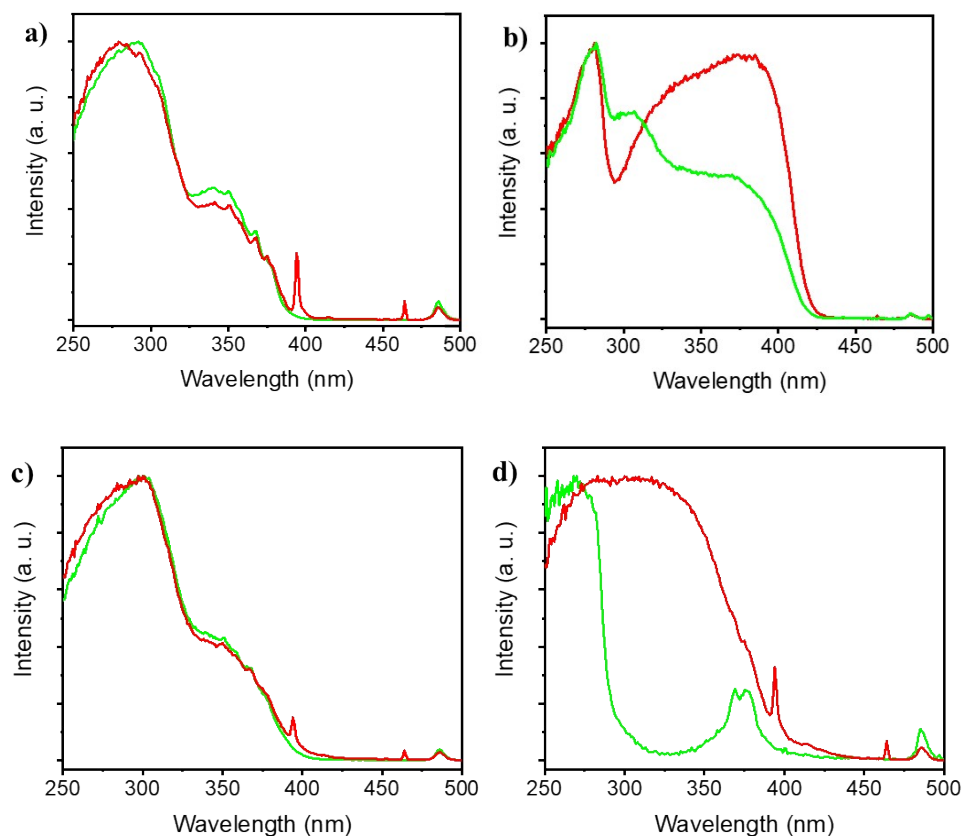

**Figure S19:** Room temperature excitation spectra of the exchanged MOFs a) UCY-17(Eu<sub>0.05</sub>Tb<sub>0.95</sub>)/BDC, b) UCY-17(Eu<sub>0.05</sub>Tb<sub>0.95</sub>)/ABDC, c) UCY-17(Eu<sub>0.05</sub>Tb<sub>0.95</sub>)/FBDC, d) UCY-17(Eu<sub>0.05</sub>Tb<sub>0.95</sub>)/NDC, monitoring the transitions  $^5D_0 \rightarrow ^7F_2$  of Eu<sup>3+</sup> (red solid line,  $\lambda_{em} = 614$  nm) and  $^5D_4 \rightarrow ^7F_5$  of Tb<sup>3+</sup> (green solid line,  $\lambda_{em} = 543$  nm) ions.

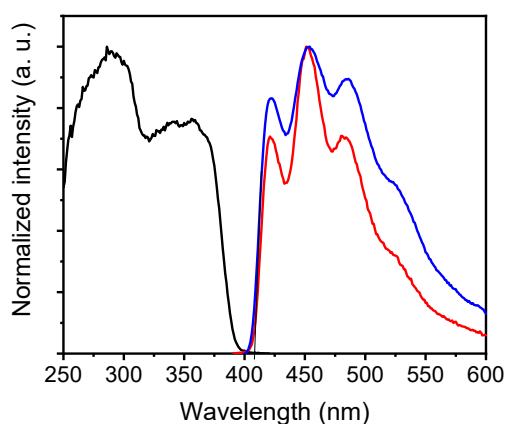

**Figure S20:** Normalized phosphorescence spectrum recorded at 77K of the pristine UCY-17(Gd) (blue solid line) ( $\lambda_{exc} = 301$  nm, according to the excitation spectrum (black solid line)), and time-resolved phosphorescence spectrum at 77K integrated in a sweep range of 0.10 ms, to remove the fluorescence emission ( $S_1 \rightarrow S_0$ ) (red solid line).

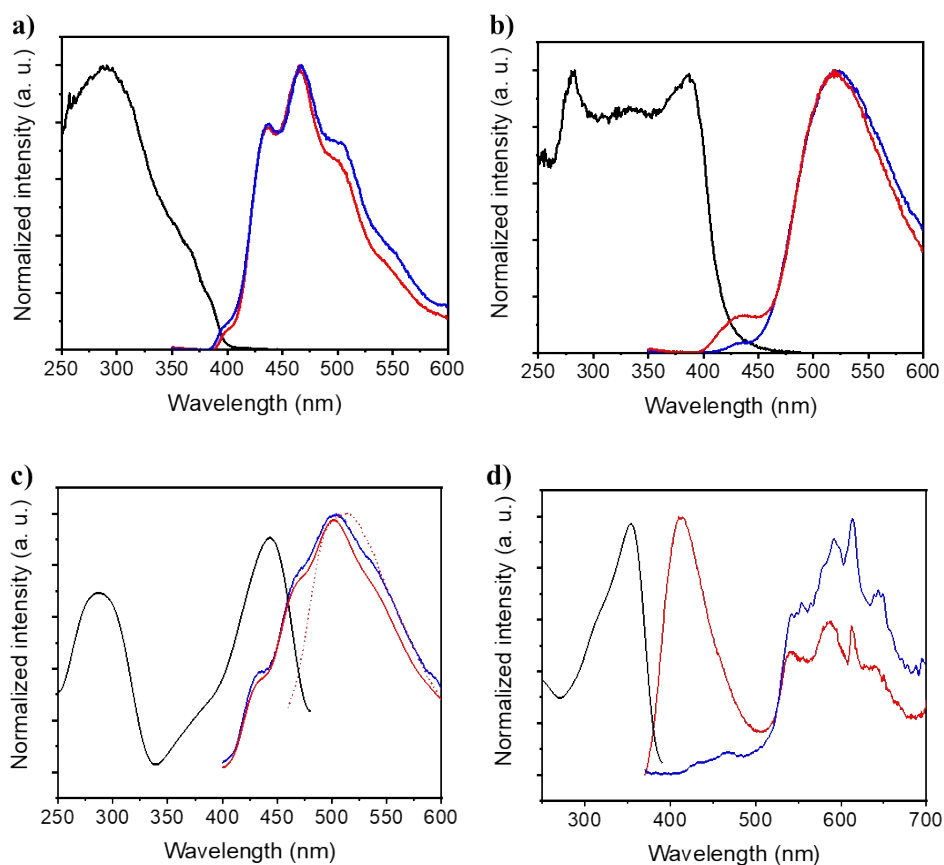

**Figure S21:** Normalized phosphorescence spectra recorded at 77K of the exchanged analogues UCY-17(Gd)/L (blue solid line) (excitation according to the excitation spectra (black solid line)), and time-resolved phosphorescence spectra at 77K integrated in a sweep range of 0.10 ms to remove the fluorescence emission ( $S_1 \rightarrow S_0$ ) (red solid line) of a) UCY-17(Gd)/BDC, b) UCY-17(Gd)/ABDC, c) UCY-17(Gd)/FBDC (red dot line corresponds to the phosphorescence at  $\lambda_{exc} = 446$  nm), d) UCY-17(Gd)/NDC.

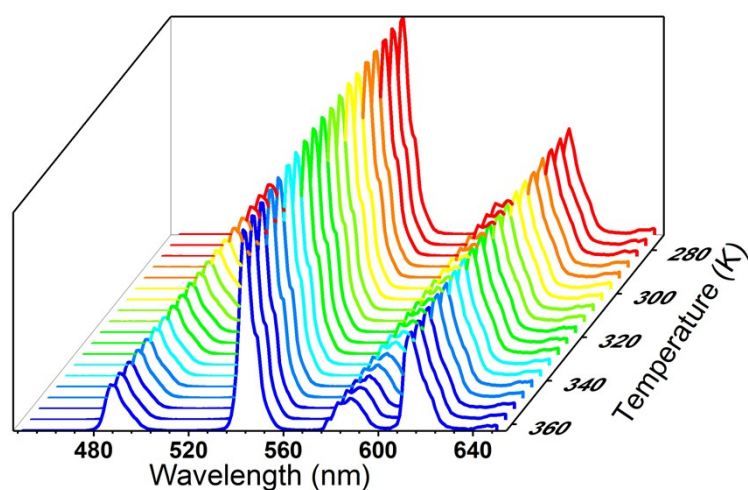

**Figure S22:** Thermal evolution of emission spectrum of the pristine MOF UCY-17(Eu<sub>0.05</sub>Tb<sub>0.95</sub>) in the temperature range 270 - 360 K.

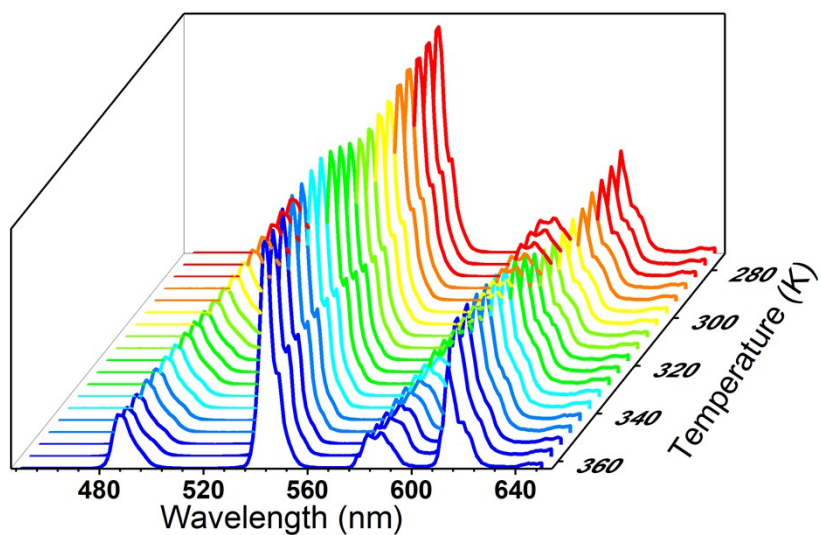

**Figure S23:** Thermal evolution of emission spectrum of compound UCY-17(Eu<sub>0.05</sub>Tb<sub>0.95</sub>)/BDC in the temperature range 270 - 360 K.

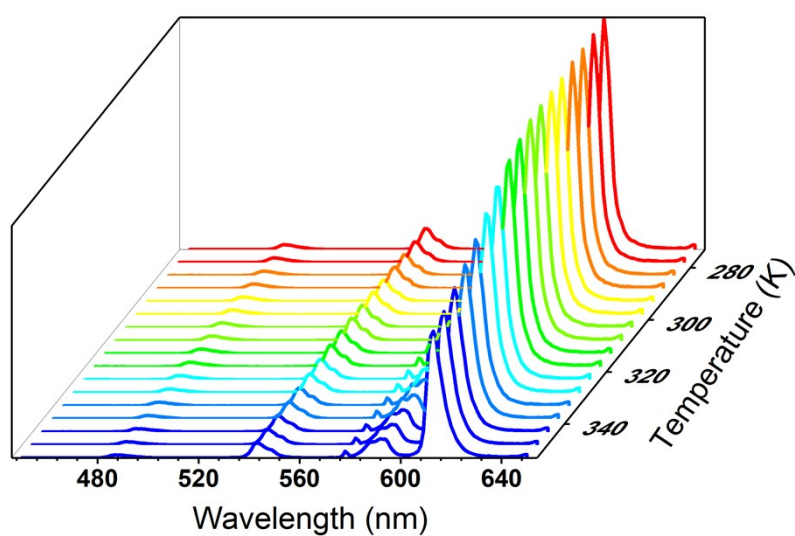

**Figure S24:** Thermal evolution of emission spectrum of compound UCY-17(Eu<sub>0.05</sub>Tb<sub>0.95</sub>)/ABDC in the temperature range 270 - 360 K.

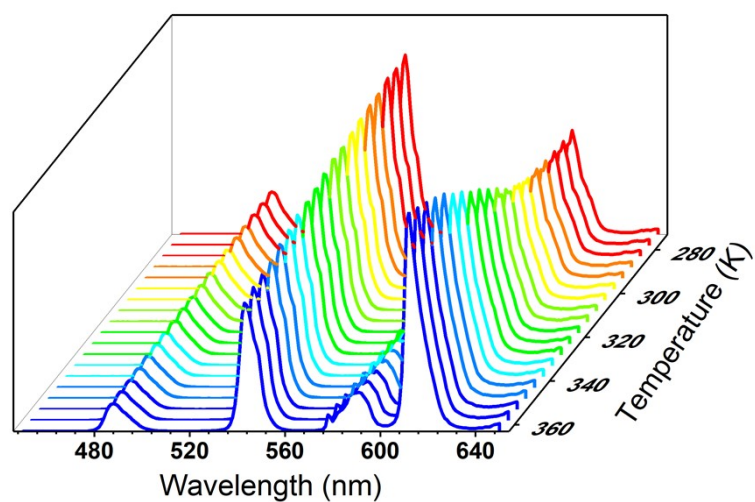

**Figure S25:** Thermal evolution of emission spectrum of compound UCY-17(Eu<sub>0.05</sub>Tb<sub>0.95</sub>)/FBDC in the temperature range 270 - 360 K.

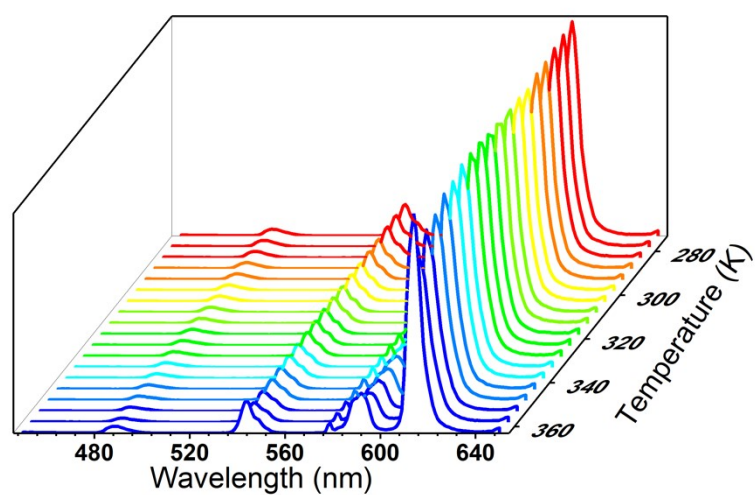

**Figure S26:** Thermal evolution of emission spectrum of compound UCY-17(Eu<sub>0.05</sub>Tb<sub>0.95</sub>)/NDC in the temperature range 270 - 360 K.

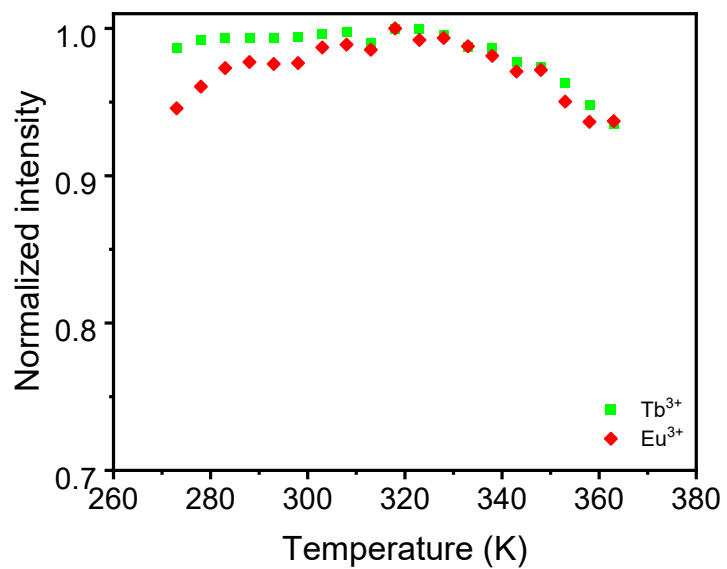

**Figure S27:** Thermal evolution of the integrated emission intensity of the pristine MOF UCY-17(Eu<sub>0.05</sub>Tb<sub>0.95</sub>) in the temperature range 270 - 360 K.

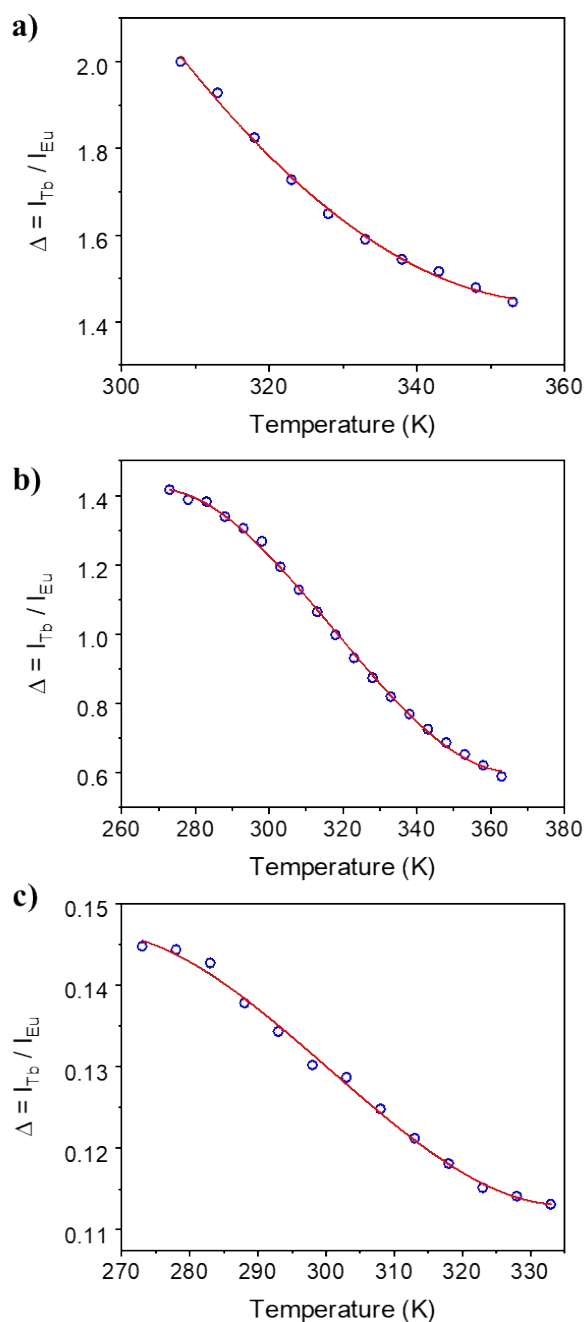

**Figure S28:** Temperature dependence of  $\Delta$  in the indicated temperature range for the exchanged MOFs a) UCY-17(Eu<sub>0.05</sub>Tb<sub>0.95</sub>)/BDC, b) UCY-17(Eu<sub>0.05</sub>Tb<sub>0.95</sub>)/FBDC and c) UCY-17(Eu<sub>0.05</sub>Tb<sub>0.95</sub>)/NDC. The red solid line represents the calibration curve obtained by the best fit of the experimental points to a polynomial equation ( $r^2 > 0.990$ ). As the thermal quenching of Eu<sup>3+</sup> and Tb<sup>3+</sup> emission for UCY-17(Eu<sub>0.05</sub>Tb<sub>0.95</sub>)/ABDC are nearly identical, the thermal evolution of the thermometric parameter for this exchanged analogue is not plotted.

**Table S6.** Chromaticity coordinates of the pristine **UCY-17(Eu<sub>0.05</sub>Tb<sub>0.95</sub>)** and the exchanged analogues **UCY-17(Eu<sub>0.05</sub>Tb<sub>0.95</sub>)/L** (L = BDC<sup>2-</sup>, ABDC<sup>2-</sup>, FBDC<sup>2-</sup> and NDC<sup>2-</sup>) excited at various wavelengths (according to their respective excitation spectra).

| Compound                                                       | (x;y) coordinates | $\lambda_{exc}$ (nm) |
|----------------------------------------------------------------|-------------------|----------------------|
| <b>UCY-17</b><br>(Eu <sub>0.05</sub> Tb <sub>0.95</sub> )      | (0.4205; 0.5238)  | 301                  |
| <b>UCY-17</b><br>(Eu <sub>0.05</sub> Tb <sub>0.95</sub> )/BDC  | (0.4007; 0.5378)  | 278                  |
| <b>UCY-17</b><br>(Eu <sub>0.05</sub> Tb <sub>0.95</sub> )/ABDC | (0.6134; 0.3740)  | 282                  |
| <b>UCY-17</b><br>(Eu <sub>0.05</sub> Tb <sub>0.95</sub> )/FBDC | (0.4405; 0.5091)  | 301                  |
| <b>UCY-17</b><br>(Eu <sub>0.05</sub> Tb <sub>0.95</sub> )/NDC  | (0.6032; 0.3765)  | 280                  |

**Table S7.** Fitting parameters of the polynomial equation ( $Y = A + Bx + Cx^2 + Dx^3$ ) to the experimental curve  $\Delta = f(T)$  for the exchanged analogues **UCY-17(Eu<sub>0.05</sub>Tb<sub>0.95</sub>)/L**. Since the thermal quenching of Eu<sup>3+</sup> and Tb<sup>3+</sup> emission is nearly identical for **UCY-17(Eu<sub>0.05</sub>Tb<sub>0.95</sub>)/ABDC**, it was more accurate to fit the thermal evolution of emission intensity data than these of the thermal evolution of the thermometric parameter.

| Compound                                               | Adjustment parameters                                                                                                                | R <sup>2</sup> |
|--------------------------------------------------------|--------------------------------------------------------------------------------------------------------------------------------------|----------------|
| <b>UCY-17(Eu<sub>0.05</sub>Tb<sub>0.95</sub>)/BDC</b>  | A = 28 ± 2<br>B = -0.15 ± 0.01<br>C = 2.1.10 <sup>-4</sup> ± 0.2.10 <sup>-4</sup><br>D = 0                                           | 0.996          |
| <b>UCY-17(Eu<sub>0.05</sub>Tb<sub>0.95</sub>)/ABDC</b> | $I_{Tb} = f(T)$                                                                                                                      | 0.991          |
|                                                        | A = -245 ± 54<br>B = 2.3 ± 0.5<br>C = -0.007 ± 0.001<br>D = 7.10 <sup>-6</sup> ± 1.10 <sup>-6</sup>                                  |                |
|                                                        | $I_{Eu} = f(T)$                                                                                                                      | 0.999          |
|                                                        | A = -220 ± 21<br>B = 2.0 ± 0.2<br>C = -0.0061 ± 0.0006<br>D = 6.1.10 <sup>-6</sup> ± 0.6.10 <sup>-6</sup>                            |                |
| <b>UCY-17(Eu<sub>0.05</sub>Tb<sub>0.95</sub>)/FBDC</b> | A = -54 ± 5<br>B = 0.54 ± 0.05<br>C = -0.017 ± 0.0002<br>D = 1.8.10 <sup>-6</sup> ± 0.2.10 <sup>-6</sup>                             | 0.999          |
| <b>UCY-17(Eu<sub>0.05</sub>Tb<sub>0.95</sub>)/NDC</b>  | A = -5 ± 1<br>B = 0.05 ± 0.01<br>C = -1.8.10 <sup>-4</sup> ± 0.4.10 <sup>-4</sup><br>D = 2.1.10 <sup>-7</sup> ± 0.5.10 <sup>-7</sup> | 0.994          |



## References

1. W. He, F. Du, Y. Wu, Y. Wang, X. Liu, H. Liu and X. Zhao, Quantitative  $^{19}\text{F}$  NMR method validation and application to the quantitative analysis of a fluoropolyphosphates mixture, *J. Fluor. Chem.*, 2006, **127**, 809.
2. N. Panagiotou, F. G. Moscoso, T. Lopes-Costa, J. M. Pedrosa and A. J. Tasiopoulos, 2-Dimensional rare earth metal-organic frameworks based on a hexanuclear secondary building unit as efficient detectors for vapours of nitroaromatics and volatile organic compounds, *Inorg. Chem. Front.*, 2022, **9**, 4850.
